# Supplementary material
Source: publisher site journal article supplement (http://kjim.org/upload/media/kjim-2021-442-suppl2.pdf)
Supplement: Supplementary file 1 [file kjim-2021-442-suppl2.pdf]

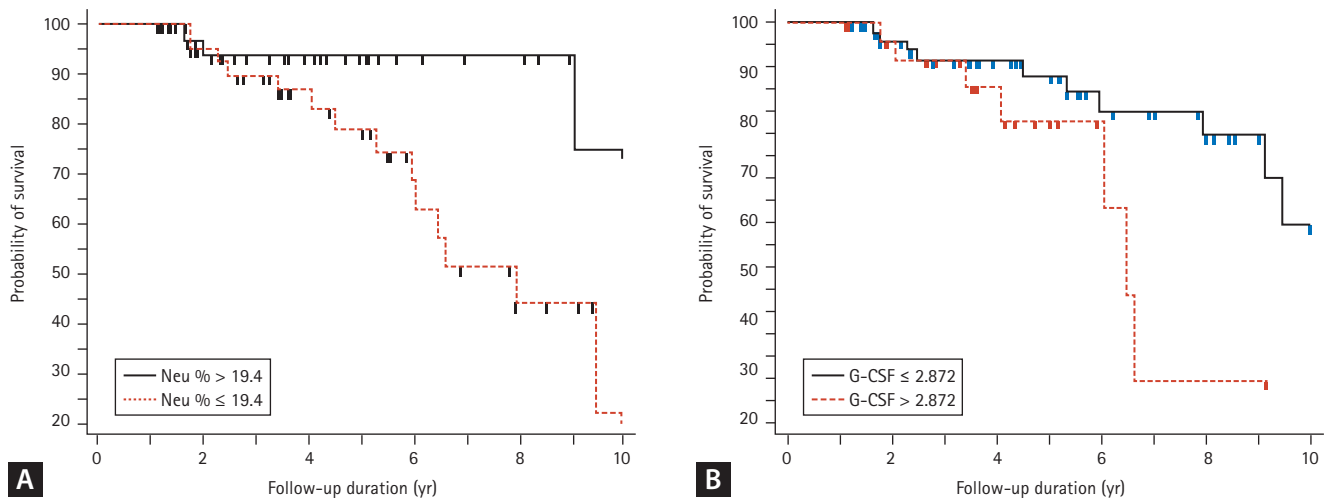

**Supplementary Figure 1.** Comparison of survival curves based on the granulocyte colony-stimulating factor (G-CSF) level adjusted for the neutrophil count. (A) The 10-year survival rate was markedly lower in the group with > 19.4% neutrophils (n = 48, dotted line) compared to the group with ≤ 19.4% neutrophils (n = 36, solid line; hazard ratio [HR], 4.07; 95% confidence interval [CI], 1.57 to 10.56;  $p = 0.024$ ). (B) The survival rate adjusted for the neutrophil count was significantly lower in the group with G-CSF > 2.872 pg/mL (n = 36, dotted line) than the group with G-CSF ≤ 2.872 pg/mL (n = 48, solid line; HR, 2.46; 95% CI, 0.78 to 7.75;  $p = 0.041$ ).
